# Supplementary material
Source: PubMed Central journal article supplement (PMC2817370)

**Supplemental Fig. 2.** Genomic structure of the *cGHRL*, *cGHSR*, *dGHRL*, and *dGHSR* genes.

ATG and TGA are start and stop codons, respectively. The question marks “?” indicate that the accurate exon length was unclear, which is also indicated by the dashed box.

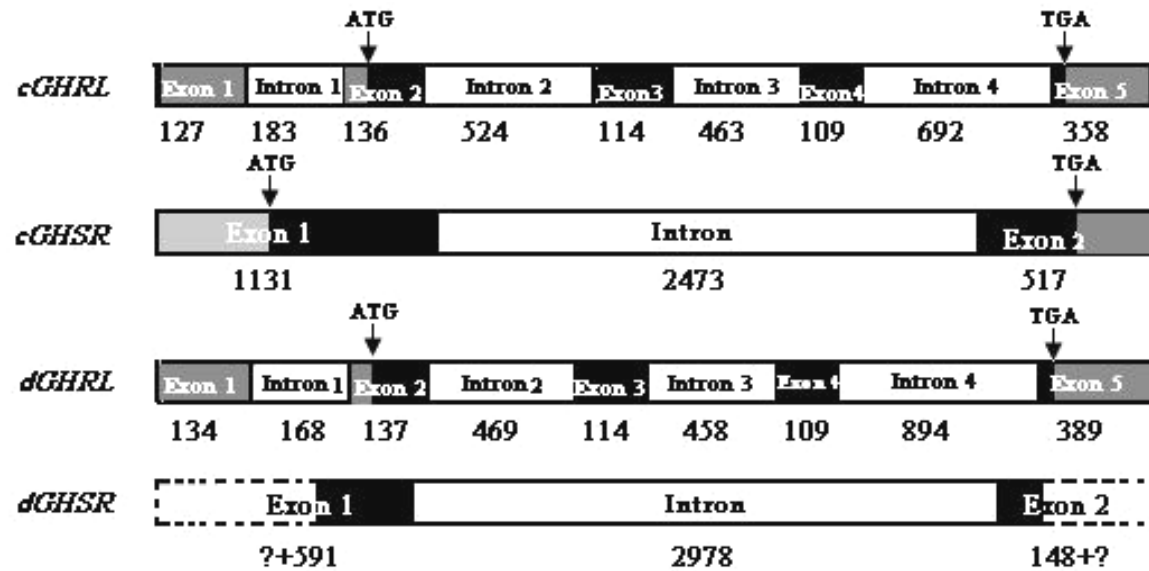

Supplement: 567120.f2.pdf [file 567120.f2.pdf]
